# Supplementary material
Source: PubMed Central journal article supplement (PMC6446206)

**Figure 8D**

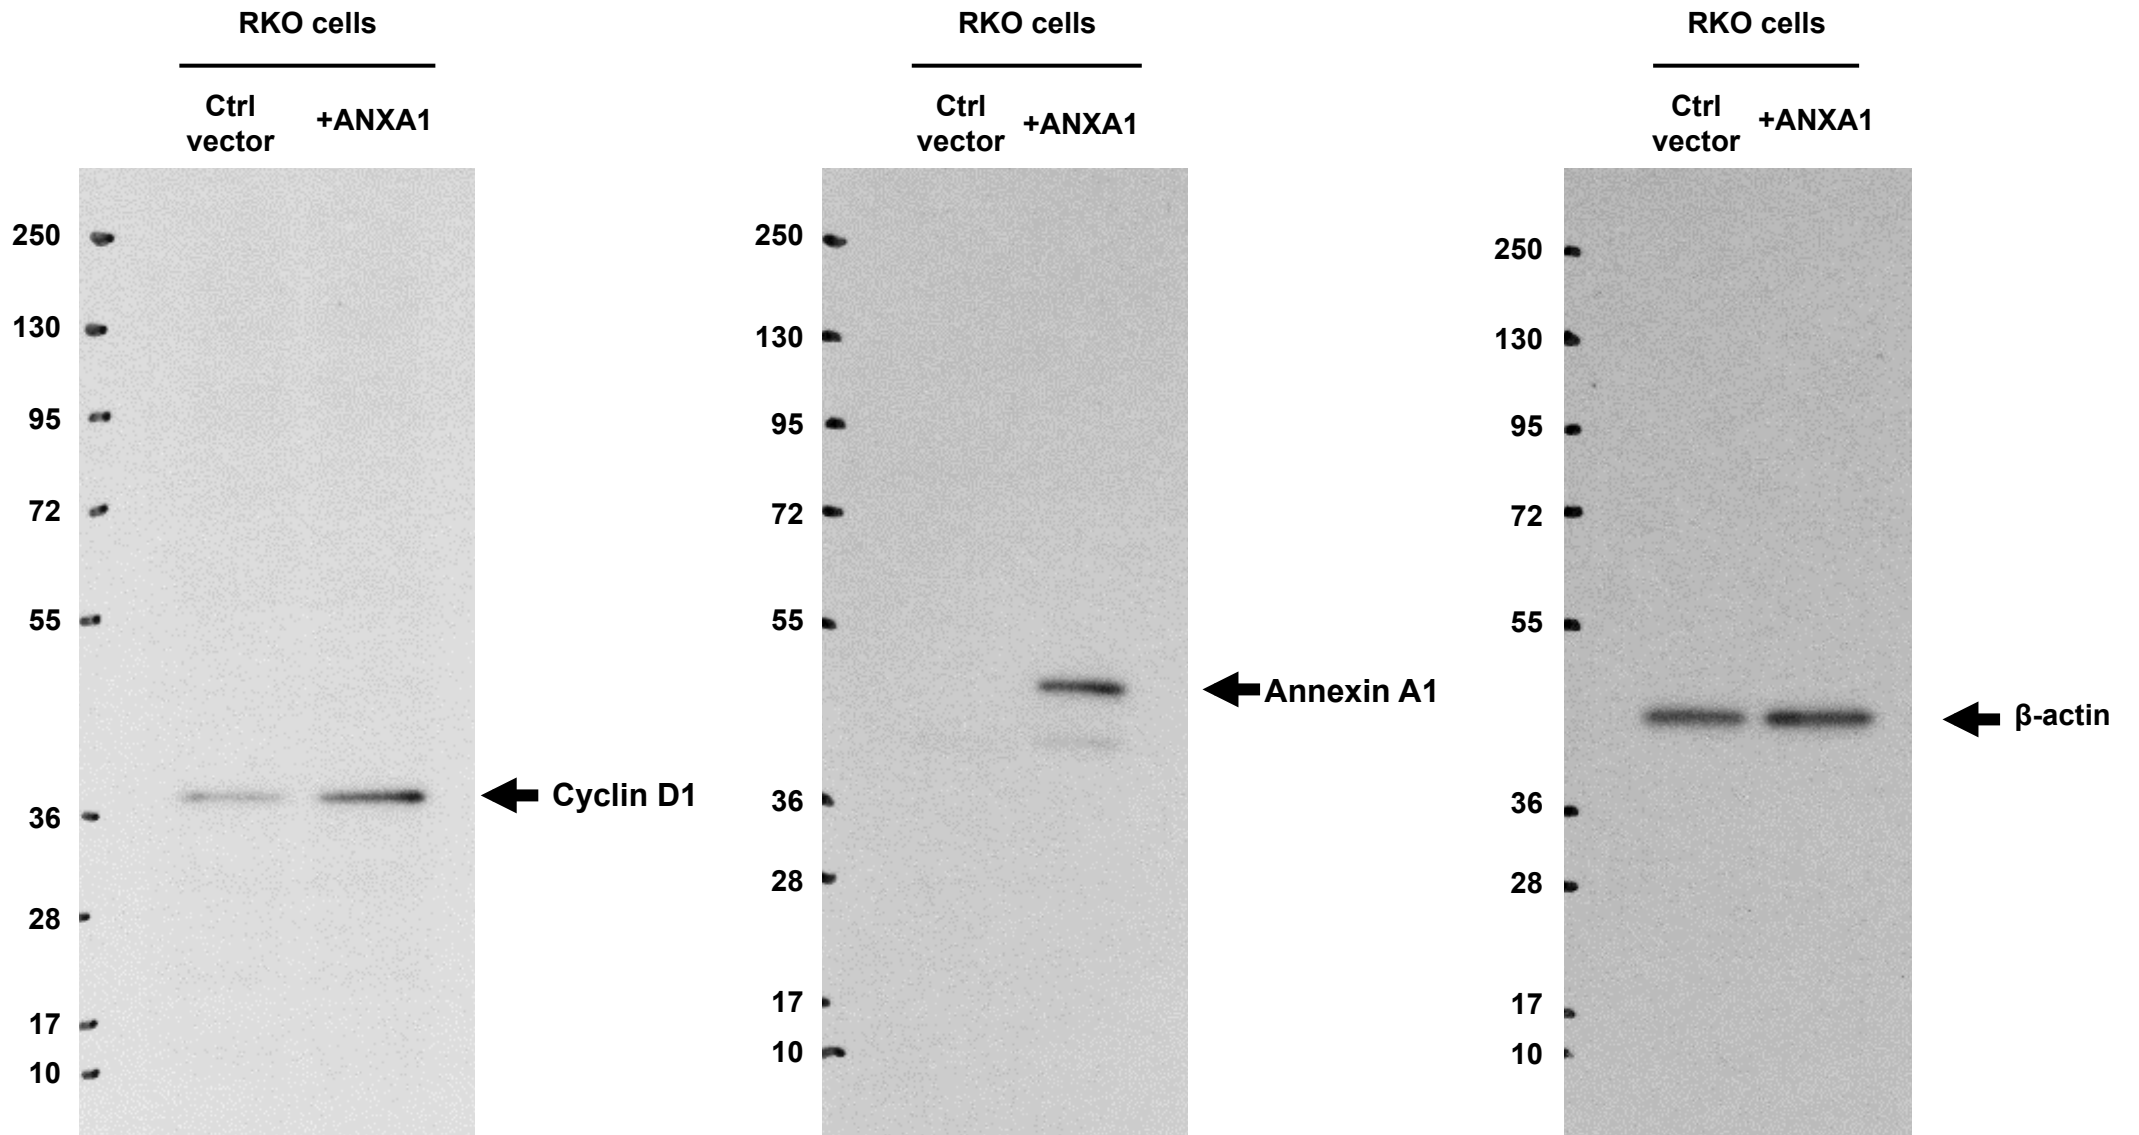

Supplement: EMBR-20-e47638-s005.pdf [file EMBR-20-e47638-s005.pdf]
